# Supplementary material for: Development, implementation, and evaluation of the Student Optimized Learning Environment (SOLE): A longitudinal team- based communication skills curriculum for medical students
Source: Research Square preprint supplement (doi:10.21203/rs.3.rs-7812247/v1), 2025-12-02
Supplement: Supplementary file 1 [file 5dcfd5d855e6f4fc722774b3.docx]

**Appendix 1. Student Optimized Learning Environment (SOLE) Course Evaluation Survey Instrument**

**Instructions:**
Please rate the extent to which you agree with the following statements about the Student Optimized Learning Environment (SOLE) course.

**Response scale:**
1 = Strongly disagree

2 = Disagree

3 = Neutral/Undecided

4 = Agree

5 = Strongly agree

| Item | Statement |
| --- | --- |
| 1 | SOLE sessions helped me to reflect on and better understand team dynamics. |
| 2 | SOLE provided opportunities to practice relationship-centered communication skills in a group setting. |
| 3 | I learned strategies for acting on the feedback that I received during SOLE. |
| 4 | I practiced strategies for acting on the feedback that I received during SOLE. |
| 5 | I learned strategies for effectively providing and receiving feedback to peers and supervisors during SOLE. |
| 6 | I practiced strategies for effectively providing and receiving feedback to peers and supervisors during SOLE. |
| 7 | SOLE sessions helped me apply the skills that optimized our Foundational Sciences learning to the clinical teams I was a part of in Foundations 2. |
